# Supplementary material for: A Support Vector Machine based method to distinguish long non-coding RNAs from protein coding transcripts
Source: PubMed Central journal article supplement (PMC5648457; doi:10.1186/s12864-017-4178-4), 2017-10-18
Supplement: 12864_2017_4178_MOESM2_ESM.pdf [file 12864_2017_4178_MOESM2_ESM.pdf]

This document contains all results obtained by the libSVM grid search. This results were used to determine the best  $C$  and  $\gamma$  parameters for each model.

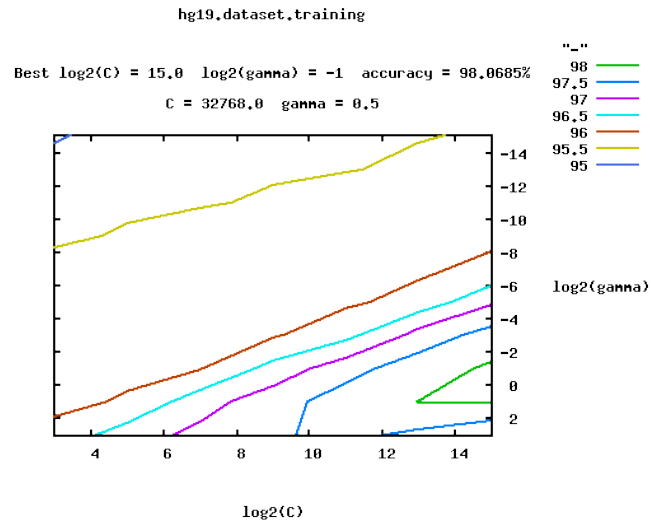

Figure 1: GRCh37 data using first ORF.

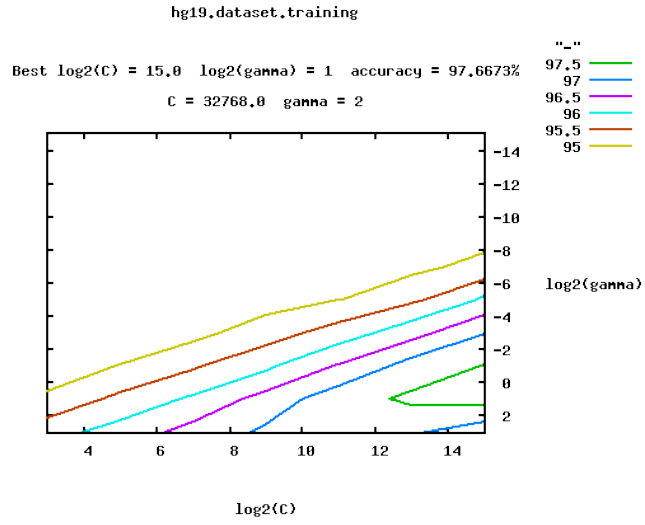

Figure 2: GRCh37 data using longest ORF.

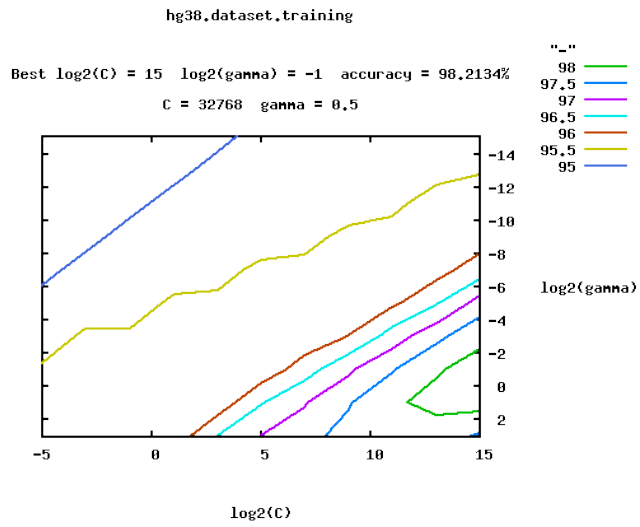

Figure 3: GRCh38 data using first ORF.

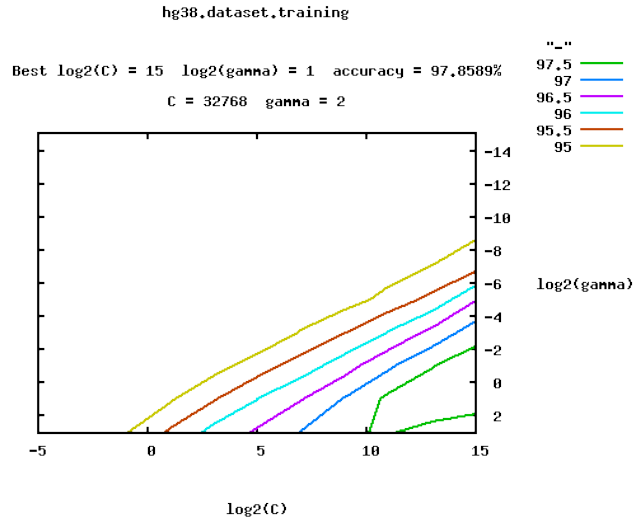

Figure 4: GRCh38 data using longest ORF.

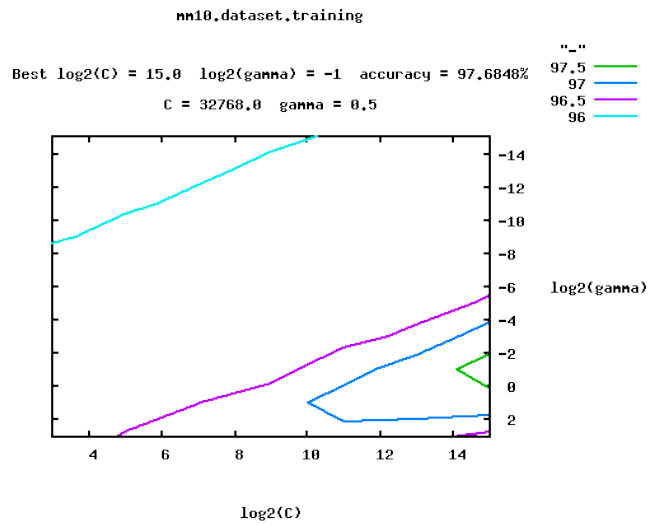

Figure 5: GRCm38 data using first ORF.

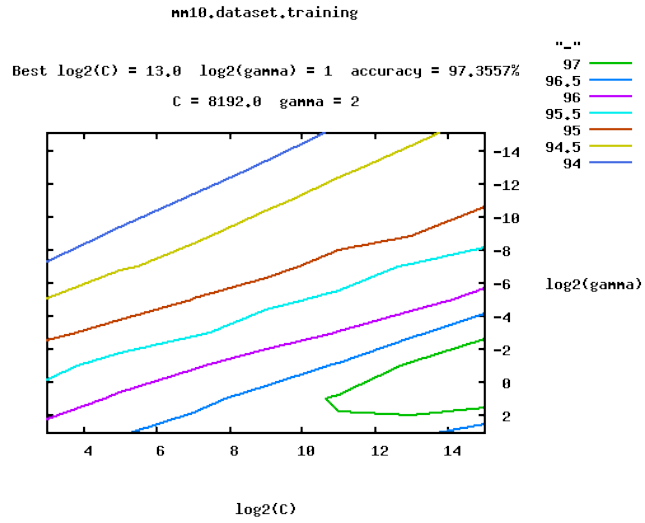

Figure 6: GRCm38 data using longest ORF.

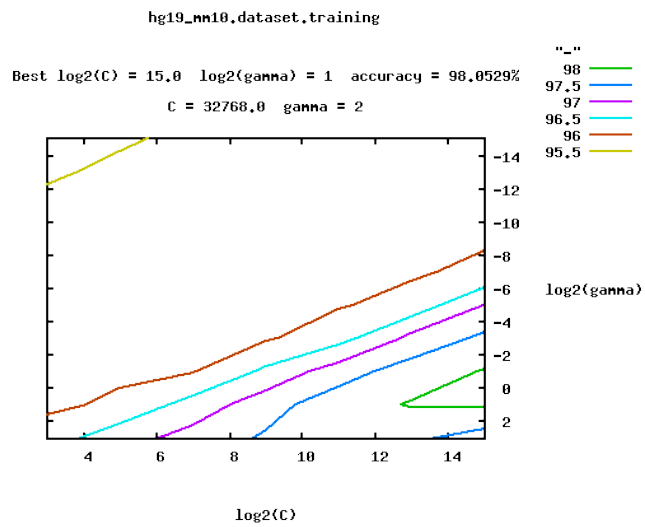

Figure 7: GRCh37 and GRCm38 data using first ORF.

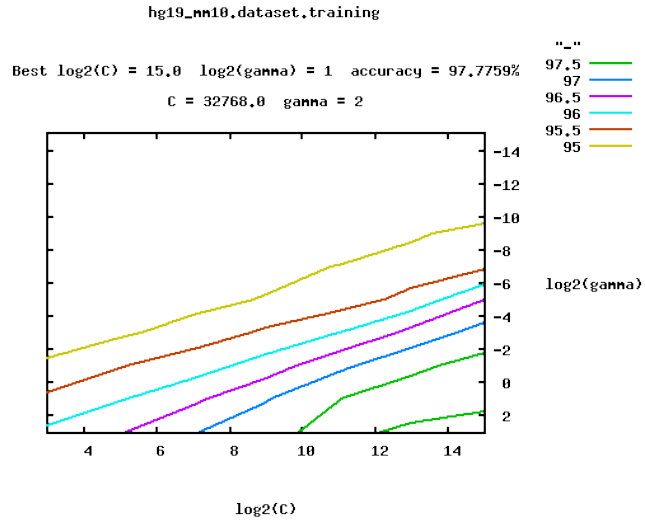

Figure 8: GRCh37 and GRCm38 data using longest ORF.

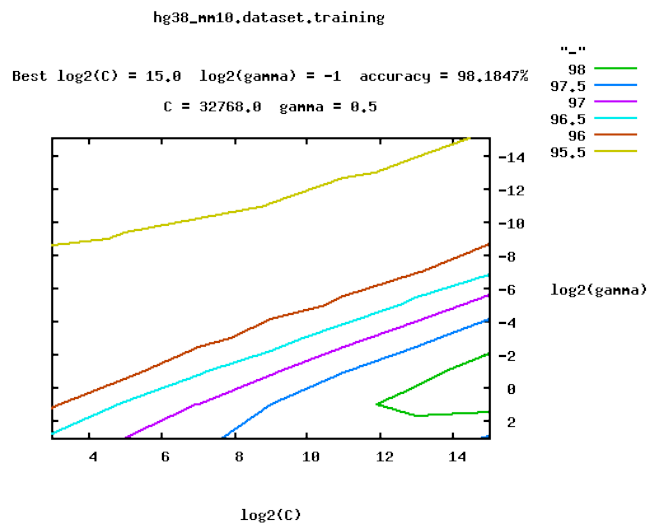

Figure 9: GRCh38 and GRCm38 data using first ORF.

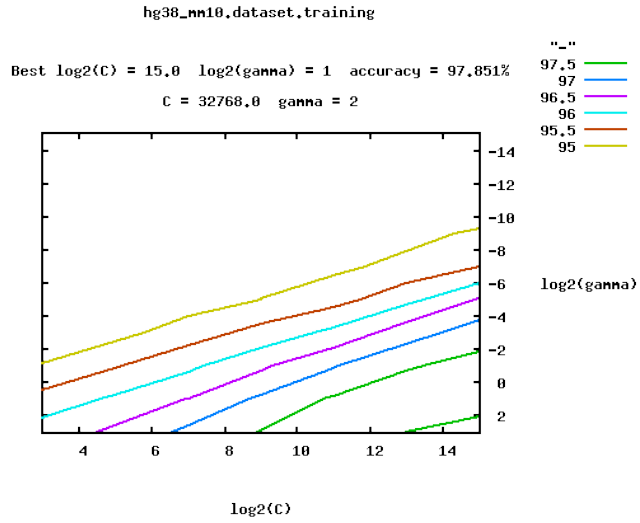

Figure 10: GRCh38 and GRCm38 data using longest ORF.

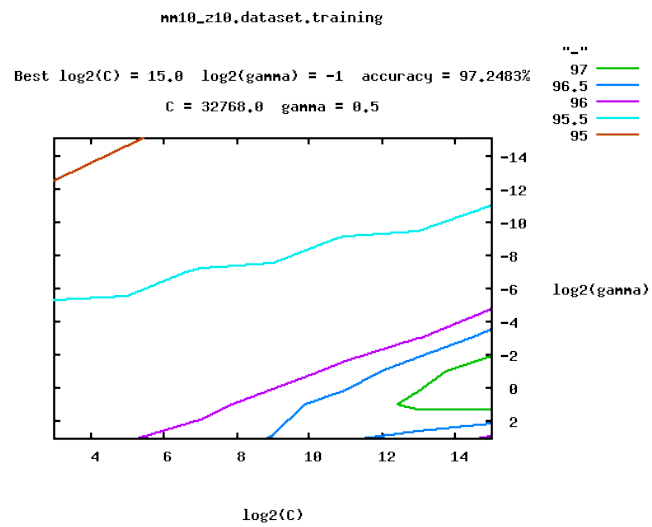

Figure 11: GRCm38 and GRCz10 data using first ORF.
